# Supplementary material
Source: PubMed Central journal article supplement (PMC7722494)
Supplement: mmc1.pdf [file mmc1.pdf]

**Supplementary Table 1.** Results of the exploratory factor analysis (EFA) on the available variables evaluated at baseline. Varimax rotation converged in 6 iterations and yielded 5 factors with an eigenvalue > 1. Component loading >0.30 or <-0.30 are reported. Multiple univariate logistic regressions were computed to predict the association between each factor and the likelihood of adverse clinical response or death in TCZ-treated COVID-19 patients. B, beta value; OR, odds ratio; SE, standard error.

| Variables at T0                | Factor loading matrix |                     |                    |                    |                     | Cumulative |
|--------------------------------|-----------------------|---------------------|--------------------|--------------------|---------------------|------------|
|                                | 1                     | 2                   | 3                  | 4                  | 5                   |            |
| miR-146a-5p                    | 0.975                 |                     |                    |                    |                     |            |
| miR-21-5p                      | 0.972                 |                     |                    |                    |                     |            |
| miR-126-3p                     | 0.946                 |                     |                    |                    |                     |            |
| Age                            | -0.738                |                     |                    |                    |                     |            |
| IL-6                           |                       | 0.853               |                    |                    |                     |            |
| Neutrophils                    |                       | 0.843               |                    |                    |                     |            |
| Hemoglobin                     |                       |                     | 0.858              |                    |                     |            |
| Lymphocytes                    |                       |                     | 0.829              | 0.34               |                     |            |
| Platelets                      |                       |                     |                    | 0.915              |                     |            |
| D-dimer                        |                       |                     |                    |                    | 0.918               |            |
| PaO2/FiO2                      |                       |                     |                    | 0.539              | 0.664               |            |
| <b>Eigenvalue</b>              | 3.45                  | 1.85                | 1.61               | 1.39               | 1.02                |            |
| <b>Variance explained (%)</b>  | 31.3                  | 16.8                | 14.6               | 12.7               | 9.3                 | 84.7       |
| <b>Logistic regression</b>     |                       |                     |                    |                    |                     |            |
| <b>Non-responder vs Factor</b> |                       |                     |                    |                    |                     |            |
| B (SE)                         | -0.32 (0.44)          | 0.59 (0.75)         | -0.01 (0.47)       | 0.11 (0.44)        | 0.40 (0.42)         |            |
| OR (95% CI)                    | 0.74 (0.32 - 1.76)    | 1.79 (0.41 - 7.78)  | 0.99 (0.40 - 2.47) | 1.12 (0.47 - 2.65) | 1.49 (0.65 - 3.41)  |            |
| p                              | 0.501                 | 0.435               | 0.990              | 0.799              | 0.349               |            |
| <b>Death vs Factor</b>         |                       |                     |                    |                    |                     |            |
| B (SE)                         | -2.63 (1.30)          | 0.48 (1.00)         | -0.55 (0.78)       | -0.22 (0.63)       | -1.53 (2.07)        |            |
| OR (95% CI)                    | 0.07 (0.01 - 0.91)    | 1.61 (0.23 - 11.34) | 0.58 (0.13 - 2.66) | 0.98 (0.29 - 3.35) | 0.22 (0.00 - 12.60) |            |
| p                              | <b>0.043</b>          | 0.633               | 0.483              | 0.972              | 0.461               |            |
